# Supplementary material
Source: PubMed Central journal article supplement (PMC1994619)
Supplement: JCI0731986sd.pdf [file JCI0731986sd.pdf]

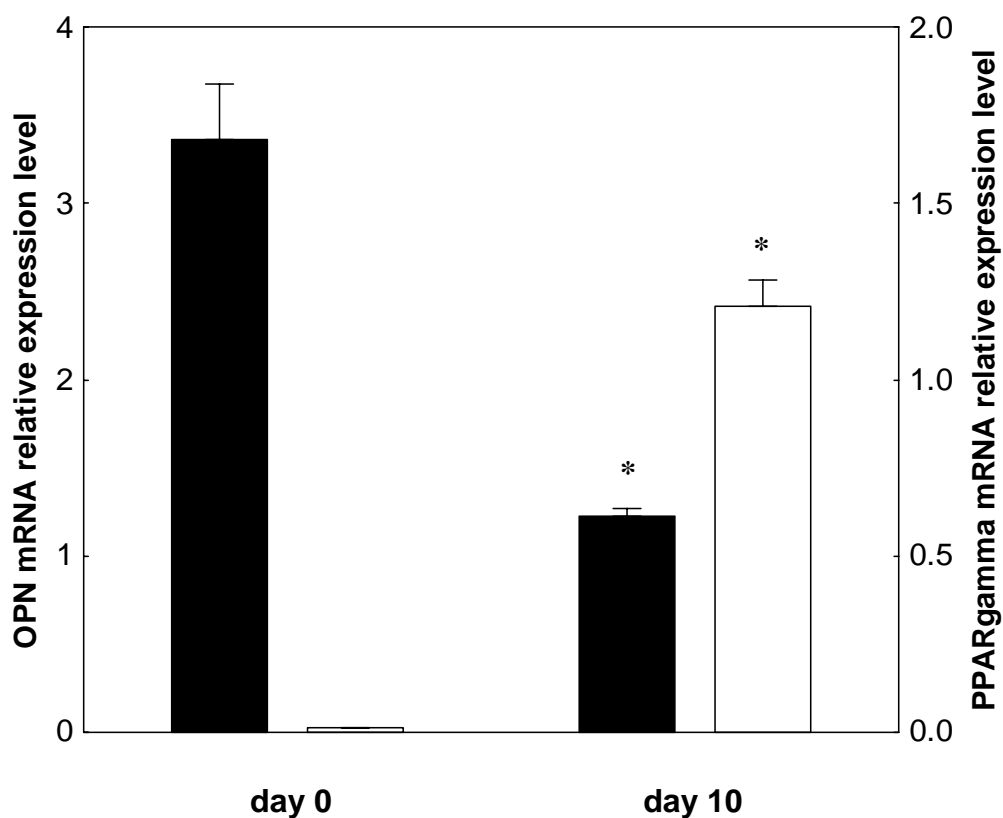

**Supplemental Figure 1.**

**OPN and PPAR $\gamma$  mRNA expression levels during differentiation of 3T3-L1**

**fibroblasts into adipocytes.** 3T3-L1 fibroblasts were differentiated *in vitro* following treatment with insulin, dexamethasone, and isobutylmethylxanthine. mRNA was isolated at day 0 and day 10 and analyzed for OPN (black bars, left y-axis) and PPAR $\gamma$  expression (white bars, right y-axis) by quantitative real-time RT-PCR. Data is presented as mean  $\pm$  SEM from four independently performed experiments (\* $P < 0.05$  vs. day 0).

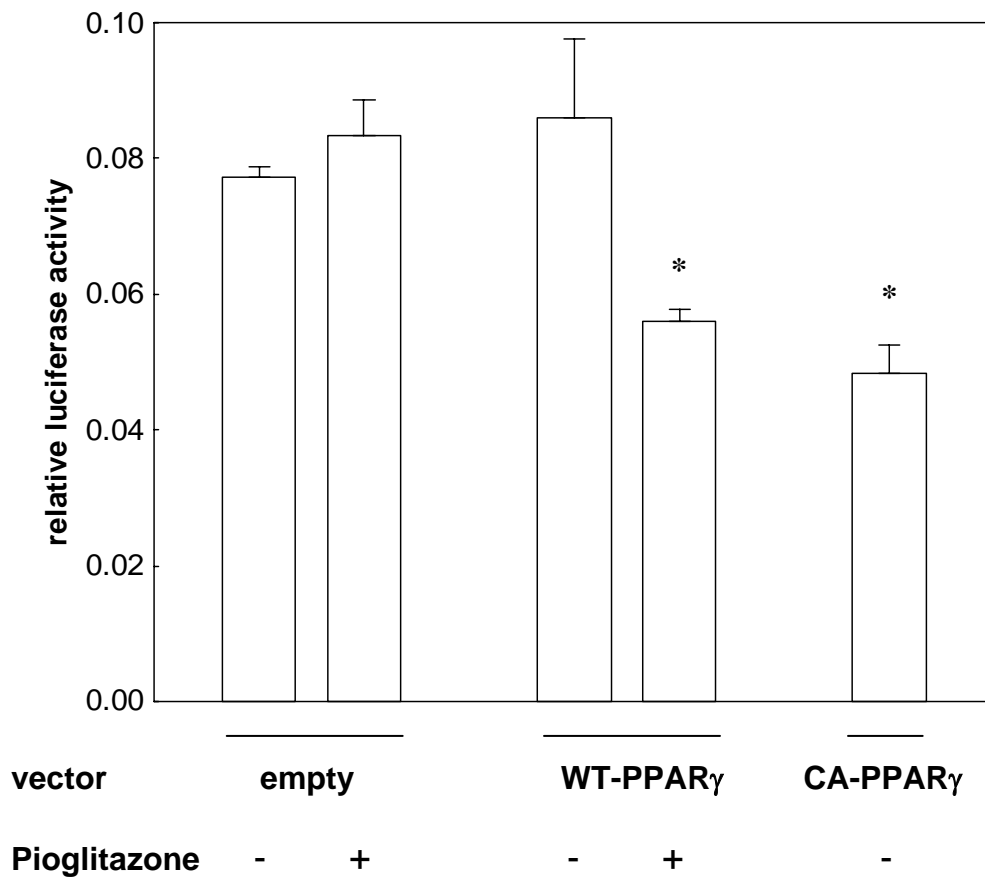

### Supplemental Figure 2.

#### **PPAR $\gamma$ activation suppresses basal OPN promoter activity in 3T3-L1 fibroblasts.**

3T3-L1 fibroblasts were transiently cotransfected with a full-length OPN promoter construct and an empty pCMV expression vector, a wildtype PPAR $\gamma$ 2 expression vector (WT-PPAR $\gamma$ ) or an expression vector overexpressing a constitutively-active PPAR $\gamma$  mutant (CA-PPAR $\gamma$ ). Transfected fibroblasts were treated for 24 h with vehicle (DMSO) or pioglitazone (10  $\mu$ M) and luciferase activities were analyzed as described in Methods. Data are expressed as normalized luciferase activity and presented as means  $\pm$  SEM from three independently performed experiments (\*P < 0.05 vs. vehicle).
